# Supplementary material
Source: MDPI journal article supplement (https://www.mdpi.com/2227-9717/11/11/3141)
Supplement: s1 [file s1]

Table S1. Mass concentration of flavonols, flavanones, flavones, HCA and HBA determined in monofloral honey extracts obtained by UAE

| UAE                       | 1          | 2          | 3          | 4          | 5          | 6          | 7          | 8          | 9          | 10         | 11         | 12         | 13         |
|---------------------------|------------|------------|------------|------------|------------|------------|------------|------------|------------|------------|------------|------------|------------|
| <b>FLAVONOLS</b>          |            |            |            |            |            |            |            |            |            |            |            |            |            |
| Rutin                     | 0.150±0.03 | 0.168±0.04 | 0.039±0.04 | 0.166±0.02 | 0.034±0.02 | 0.028±0.02 | 0.068±0.02 | 0.023±0.01 | 0.056±0.02 | 0.180±0.03 | 0.025±0.02 | 0.066±0.02 | 0.119±0.03 |
| Quercetin-3-glucoside     | 0.100±0.03 | 0.056±0.05 | 0.131±0.05 | 0.104±0.02 | 0.052±0.03 | 0.152±0.05 | 0.076±0.02 | 0.138±0.02 | 0.102±0.03 | 0.120±0.03 | 0.112±0.03 | 0.347±0.05 | 0.236±0.05 |
| Kaempferol-3-glucoside    | 0.029±0.01 | 0.080±0.03 | 0.133±0.03 | 0.104±0.03 | 0.069±0.03 | 0.038±0.03 | 0.105±0.01 | 0.047±0.02 | 0.032±0.02 | 0.058±0.03 | 0.049±0.03 | 0.048±0.02 | 0.071±0.03 |
| Myricetin                 | 0.041±0.04 | 0.035±0.03 | 0.044±0.03 | 0.033±0.03 | 0.032±0.02 | 0.024±0.02 | 0.035±0.01 | 0.023±0.01 | 0.036±0.02 | 0.027±0.02 | 0.026±0.02 | 0.049±0.02 | 0.029±0.02 |
| Isorhamnetin              | 0.183±0.03 | 0.135±0.03 | 0.072±0.03 | 0.504±0.03 | 0.157±0.03 | 0.228±0.03 | 0.144±0.03 | 0.200±0.03 | 0.362±0.02 | 0.342±0.04 | 0.086±0.04 | 0.554±0.03 | 0.174±0.03 |
| Quercetin                 | 0.467±0.05 | 0.815±0.04 | 0.778±0.04 | 0.363±0.02 | 0.189±0.03 | 0.319±0.03 | 0.184±0.02 | 0.315±0.03 | 0.356±0.02 | 0.493±0.05 | 0.126±0.05 | 0.587±0.03 | 0.263±0.03 |
| Kaemferol                 | 0.175±0.03 | 0.282±0.02 | 0.084±0.02 | 0.160±0.02 | 0.070±0.04 | 0.116±0.04 | 0.132±0.01 | 0.052±0.02 | 0.429±0.03 | 0.076±0.04 | 0.093±0.02 | 0.141±0.04 | 0.054±0.03 |
| Galangin                  | 0.076±0.03 | 0.103±0.03 | 0.070±0.03 | 0.044±0.02 | 0.143±0.04 | 0.127±0.03 | 0.085±0.01 | 0.232±0.04 | 0.076±0.02 | 0.041±0.03 | 0.156±0.05 | 0.078±0.03 | 0.095±0.02 |
| <b>FLAVANONES</b>         |            |            |            |            |            |            |            |            |            |            |            |            |            |
| Pinocembrin               | 0.181±0.03 | 0.142±0.04 | 0.303±0.05 | 0.345±0.03 | 0.180±0.03 | 0.248±0.03 | 0.144±0.03 | 0.348±0.04 | 0.342±0.02 | 0.277±0.02 | 0.154±0.03 | 0.322±0.03 | 0.367±0.03 |
| Naringenin                | 0.067±0.03 | 0.033±0.02 | 0.018±0.01 | 0.015±0.01 | 0.044±0.04 | 0.078±0.04 | 0.052±0.02 | 0.044±0.03 | 0.034±0.03 | 0.028±0.01 | 0.027±0.01 | 0.036±0.02 | 0.045±0.01 |
| <b>FLAVONES</b>           |            |            |            |            |            |            |            |            |            |            |            |            |            |
| Luteolin                  | 0.097±0.03 | 0.014±0.01 | 0.072±0.03 | 0.025±0.02 | 0.017±0.01 | 0.014±0.01 | 0.045±0.02 | 0.061±0.02 | 0.048±0.02 | 0.065±0.01 | 0.060±0.02 | 0.022±0.01 | 0.016±0.01 |
| Apigenin                  | 0.512±0.04 | 0.207±0.04 | 0.672±0.03 | 0.764±0.05 | 0.393±0.04 | 0.548±0.05 | 0.310±0.03 | 0.675±0.03 | 0.660±0.01 | 0.578±0.03 | 0.432±0.03 | 0.580±0.02 | 0.192±0.02 |
| Chrysin                   | 0.508±0.05 | 0.760±0.04 | 0.751±0.04 | 0.587±0.07 | 0.315±0.03 | 0.832±0.03 | 0.614±0.03 | 0.939±0.02 | 0.596±0.03 | 0.267±0.02 | 0.918±0.04 | 0.615±0.06 | 0.360±0.03 |
| Apigenin-7-O-glucoside    | 0.086±0.02 | 0.079±0.02 | 0.038±0.03 | 0.035±0.01 | 0.072±0.04 | 0.064±0.02 | 0.058±0.02 | 0.111±0.01 | 0.080±0.02 | 0.143±0.03 | 0.066±0.03 | 0.071±0.02 | 0.085±0.03 |
| <b>HCA</b>                |            |            |            |            |            |            |            |            |            |            |            |            |            |
| Ferulic acid              | 1.618±0.03 | 1.505±0.05 | 1.354±0.03 | 0.858±0.03 | 0.545±0.05 | 0.716±0.05 | 0.682±0.02 | 0.825±0.02 | 0.755±0.06 | 1.629±0.03 | 1.153±0.03 | 1.580±0.03 | 0.512±0.03 |
| Chlorogenic acid          | 0.163±0.03 | 0.158±0.04 | 0.082±0.02 | 0.115±0.02 | 0.244±0.05 | 0.184±0.06 | 0.135±0.02 | 0.096±0.06 | 0.041±0.03 | 0.211±0.02 | 0.103±0.04 | 0.155±0.02 | 0.070±0.02 |
| Caffeic acid              | 0.170±0.02 | 0.130±0.04 | 0.120±0.01 | 0.150±0.03 | 0.187±0.05 | 0.176±0.05 | 0.120±0.01 | 0.219±0.04 | 0.209±0.04 | 0.188±0.01 | 0.186±0.06 | 0.157±0.02 | 0.110±0.02 |
| p-coumaric acid           | 0.583±0.03 | 1.199±0.04 | 0.254±0.03 | 1.277±0.02 | 1.991±0.35 | 1.645±0.06 | 1.965±0.03 | 1.959±0.03 | 0.259±0.02 | 1.981±0.02 | 0.500±0.04 | 0.382±0.03 | 0.344±0.02 |
| <b>HBA</b>                |            |            |            |            |            |            |            |            |            |            |            |            |            |
| Vanillic acid             | 0.380±0.03 | 0.274±0.03 | 0.448±0.02 | 0.550±0.03 | 0.354±0.03 | 0.384±0.04 | 0.363±0.14 | 0.143±0.03 | 0.357±0.01 | 0.283±0.02 | 0.171±0.04 | 0.435±0.03 | 0.116±0.02 |
| 2,5-Dihydroxybenzoic acid | 0.428±0.02 | 0.063±0.01 | 0.114±0.02 | 0.319±0.03 | 0.077±0.04 | 0.163±0.03 | 0.249±0.03 | 0.140±0.02 | 0.345±0.02 | 0.041±0.02 | 0.153±0.04 | 0.259±0.02 | 0.198±0.03 |
| 3,4-Dihydroxybenzoic acid | 0.082±0.02 | 0.075±0.02 | 0.116±0.02 | 0.088±0.02 | 0.131±0.02 | 0.084±0.02 | 0.117±0.01 | 0.106±0.01 | 0.475±0.01 | 0.413±0.04 | 0.070±0.03 | 0.060±0.03 | 0.114±0.03 |
| p-hydroxybenzoic acid     | 1.713±0.03 | 1.582±0.02 | 0.019±0.01 | 1.000±0.04 | 1.352±0.06 | 1.186±0.03 | 3.102±0.03 | 0.018±0.01 | 0.921±0.03 | 1.414±0.03 | 1.258±0.05 | 1.416±0.03 | 1.466±0.03 |

UAE = ultrasound-assisted extraction. Results are expressed as mean  $\pm$  SD. Samples 1, 2, 3, 4 - mint (*Mentha* spp.); sample 5–fennel (*Foeniculum vulgare*); sample 6-raspberry (*Rubus idaeus*); samples 7 and 8-lavender (*Lavandula* sp.); sample 9-ailanthus (*Ailanthus altissima*); sample 10–Lovran maroon (*Castanea sativa* Mill.); sample 11 - sage (*Salvia officinalis* L.); sample 12 - buckwheat (*Fagopyrum esculentum* Moench); and sample 13-maroon (*Castanea sativa* Mill.); HCA – hydroxycinnamic acids; HBA – hydroxybenzoic acids

Table S2. Mass concentration of flavonols, flavanones, flavones, HCA and HBA determined in monofloral honey extracts obtained by MAE

| MAE                           | 1          | 2          | 3          | 4          | 5          | 6          | 7          | 8          | 9          | 10         | 11         | 12         | 13         |
|-------------------------------|------------|------------|------------|------------|------------|------------|------------|------------|------------|------------|------------|------------|------------|
| FLAVONOLS                     |            |            |            |            |            |            |            |            |            |            |            |            |            |
| Rutin                         | 0.226±0.03 | 0.092±0.04 | 0.102±0.03 | 0.03±0.02  | 0.049±0.02 | nd.        | 0.101±0.03 | 0.162±0.02 | nd.        | 0.140±0.02 | 0.217±0.02 | 0.108±0.02 | 0.069±0.03 |
| Quercetin-3-glucoside         | 0.190±0.02 | 0.238±0.05 | 0.171±0.03 | 0.137±0.02 | 0.090±0.03 | 0.167±0.02 | 0.121±0.03 | 0.137±0.02 | 0.072±0.03 | 0.100±0.05 | 0.105±0.02 | 0.052±0.03 | 0.119±0.03 |
| Kaempferol-3-glucoside        | 0.124±0.04 | 0.101±0.03 | 0.165±0.02 | 0.037±0.02 | 0.067±0.04 | 0.062±0.02 | 0.080±0.02 | 0.074±0.02 | 0.157±0.03 | 0.033±0.05 | 0.068±0.03 | 0.191±0.02 | 0.055±0.03 |
| Myricetin                     | 0.027±0.02 | 0.043±0.02 | 0.040±0.03 | 0.027±0.03 | 0.020±0.03 | 0.060±0.02 | 0.026±0.01 | 0.016±0.01 | 0.021±0.01 | 0.037±0.02 | 0.060±0.03 | 0.912±0.07 | 0.087±0.02 |
| Isorhamnetin                  | 0.217±0.02 | 0.035±0.02 | 0.108±0.02 | 0.518±0.01 | 0.116±0.04 | 0.182±0.02 | 0.201±0.03 | 0.111±0.03 | 0.317±0.03 | 0.429±0.04 | 0.166±0.03 | 0.269±0.04 | 0.208±0.02 |
| Quercetin                     | 0.369±0.03 | 0.783±0.02 | 0.679±0.03 | 0.446±0.03 | 0.616±0.07 | 0.300±0.03 | 0.320±0.02 | 0.476±0.03 | 0.394±0.03 | 0.229±0.04 | 0.071±0.02 | 0.107±0.04 | 0.090±0.03 |
| Kaemferol                     | 0.064±0.03 | 0.239±0.02 | 0.118±0.02 | 0.337±0.03 | 0.196±0.02 | 0.120±0.03 | 0.163±0.03 | 0.061±0.03 | 0.351±0.03 | 0.251±0.03 | 0.064±0.03 | 0.070±0.03 | 0.098±0.02 |
| Galangin                      | 0.063±0.03 | 0.078±0.03 | 0.039±0.02 | 0.042±0.03 | 0.127±0.03 | 0.044±0.03 | 0.121±0.02 | 0.117±0.03 | 0.034±0.02 | 0.107±0.03 | 0.039±0.03 | 0.146±0.03 | 0.080±0.03 |
| FLAVANONES                    |            |            |            |            |            |            |            |            |            |            |            |            |            |
| Pinocembrin                   | 0.176±0.03 | 0.232±0.02 | 0.407±0.04 | 0.230±0.03 | 0.158±0.02 | 0.297±0.03 | 0.300±0.03 | 0.204±0.02 | 0.284±0.02 | 0.252±0.03 | 0.163±0.03 | 0.198±0.03 | 0.232±0.02 |
| Naringenin                    | 0.037±0.02 | 0.034±0.03 | 0.015±0.01 | 0.015±0.01 | 0.042±0.03 | 0.046±0.02 | 0.078±0.03 | 0.046±0.04 | 0.027±0.04 | 0.026±0.02 | 0.024±0.02 | 0.045±0.05 | 0.036±0.01 |
| FLAVONES                      |            |            |            |            |            |            |            |            |            |            |            |            |            |
| Luteolin                      | 0.073±0.02 | 0.014±0.01 | 0.086±0.02 | 0.073±0.03 | 0.017±0.02 | 0.057±0.03 | 0.021±0.01 | 0.014±0.02 | 0.073±0.02 | 0.043±0.01 | 0.015±0.01 | 0.015±0.01 | 0.036±0.03 |
| Apigenin                      | 0.350±0.02 | 0.352±0.03 | 0.520±0.03 | 0.278±0.02 | 0.235±0.03 | 0.466±0.04 | 0.378±0.02 | 0.447±0.05 | 0.540±0.03 | 0.650±0.06 | 0.333±0.05 | 0.672±0.05 | 0.314±0.02 |
| Chrysin                       | 0.635±0.05 | 0.870±0.03 | 0.825±0.03 | 0.389±0.03 | 0.247±0.03 | 0.689±0.04 | 0.856±0.03 | 0.981±0.03 | 0.493±0.03 | 0.165±0.03 | 0.925±0.03 | 0.469±0.03 | 0.225±0.03 |
| Apigenin-7-O-glucoside        | 0.125±0.03 | 0.054±0.03 | 0.074±0.02 | 0.107±0.02 | 0.027±0.04 | 0.061±0.01 | 0.065±0.03 | 0.183±0.02 | 0.085±0.03 | 0.127±0.03 | 0.076±0.02 | 0.108±0.04 | 0.095±0.03 |
| HCA                           |            |            |            |            |            |            |            |            |            |            |            |            |            |
| Ferulic acid                  | 1.482±0.02 | 1.353±0.03 | 1.467±0.03 | 1.584±0.06 | 0.662±0.07 | 0.617±0.04 | 0.590±0.06 | 0.731±0.04 | 0.689±0.04 | 1.596±0.03 | 0.801±0.03 | 1.460±0.03 | 0.598±0.04 |
| Chlorogenic acid              | 0.097±0.02 | 0.107±0.04 | 0.104±0.01 | 0.059±0.02 | 0.380±0.02 | 0.344±0.02 | 0.093±0.02 | 0.126±0.02 | 0.035±0.03 | 0.187±0.04 | 0.197±0.03 | 0.296±0.03 | 0.113±0.03 |
| Caffeic acid                  | 0.250±0.02 | 0.121±0.02 | 0.160±0.03 | 0.151±0.03 | 0.130±0.03 | 0.150±0.02 | 0.140±0.03 | 0.175±0.03 | 0.173±0.03 | 0.164±0.03 | 0.138±0.02 | 0.159±0.04 | 0.172±0.03 |
| <i>p</i> -coumaric acid       | 0.331±0.03 | 0.998±0.05 | 0.315±0.02 | 0.966±0.06 | 1.540±0.02 | 1.493±0.02 | 1.654±0.04 | 1.837±0.05 | 0.212±0.02 | 1.895±0.03 | 0.567±0.06 | 0.481±0.02 | 0.411±0.04 |
| HBA                           |            |            |            |            |            |            |            |            |            |            |            |            |            |
| Vanillic acid                 | 0.503±0.03 | 0.338±0.02 | 0.483±0.05 | 0.582±0.05 | 0.455±0.03 | 0.457±0.03 | 0.457±0.03 | 0.189±0.02 | 0.410±0.03 | 0.553±0.03 | 0.205±0.05 | 0.373±0.06 | 0.203±0.04 |
| 2,5-Dihydroxybenzoic acid     | 0.171±0.03 | 0.087±0.01 | 0.090±0.03 | 0.084±0.02 | 0.118±0.03 | 0.085±0.05 | 0.119±0.03 | 0.078±0.04 | 0.259±0.05 | 0.101±0.03 | 0.116±0.03 | 0.154±0.02 | 0.107±0.03 |
| 3,4-Dihydroxybenzoic acid     | 0.150±0.03 | 0.058±0.03 | 0.090±0.02 | 0.108±0.03 | 0.181±0.02 | 0.103±0.02 | 0.070±0.04 | 0.153±0.03 | 0.222±0.03 | 0.272±0.02 | 0.071±0.03 | 0.059±0.04 | 0.269±0.02 |
| <i>p</i> -hydroxybenzoic acid | 2.029±0.02 | 1.387±0.03 | 0.022±0.01 | 1.055±0.04 | 1.453±0.04 | 1.253±0.04 | 2.846±0.02 | 0.026±0.02 | 1.160±0.04 | 1.119±0.04 | 1.413±0.06 | 1.727±0.06 | 1.602±0.03 |

MAE = microwave-assisted extraction. Results are expressed as mean  $\pm$  SD. Samples 1, 2, 3, 4 - mint (*Mentha* spp.); sample 5–fennel (*Foeniculum vulgare*); sample 6-raspberry (*Rubus idaeus*); samples 7 and 8- lavender (*Lavandula* sp.); sample 9-ailanthus (*Ailanthus altissima*); sample 10–Lovran marron (*Castanea sativa* Mill.); sample 11-sage (*Salvia officinalis* L.); sample 12 - buckwheat (*Fagopyrum esculentum* Moench); and sample 13-marron (*Castanea sativa* Mill.); nd.-not detected; HCA – hydroxycinnamic acids; HBA – hydroxybenzoic acids
